# Supplementary material
Source: ML conference proceedings conference paper supplement (https://openaccess.thecvf.com/content/CVPR2024/html/Lochman_Learned_Trajectory_Embedding_CVPR_2024_paper.html)
Supplement: Supplementary file 1 [file Lochman_Learned_Trajectory_Embedding_CVPR_2024_supplemental.pdf]

# Learned Trajectory Embedding for Subspace Clustering

## Supplementary Material

### A. Experimental Details

As discussed in the main paper, the feature extractor  $f_\theta$  takes a variable-length input trajectory  $\mathbf{x}$  with two input channels representing the x and y values and outputs the feature  $\mathbf{f} \in \mathbb{R}^d$ , and the dimensionality of the latent space is set to  $d = 128$ . Specifically, the network consists of the three 1D convolutional layers (with channels changing as follows:  $2 \rightarrow 64 \rightarrow 128 \rightarrow 512$ ), followed by max pooling in the temporal domain and two linear layers ( $512 \rightarrow 128 \rightarrow 128$ ). All convolutional operations in  $f_\theta$  use kernels of size 3 with stride 1. The subspace estimator consists of the parametric basis functions  $h_{\psi_j}^j$  with trainable parameters  $(\mu_j, \alpha_j, \beta_j, \gamma_j)$  and a multilayer perceptron  $\omega_\zeta$  which infers the subspace basis coefficients from the feature  $\mathbf{f}$ . In particular,  $\omega_\zeta$  has three linear layers ( $128 \rightarrow 512 \rightarrow 1024 \rightarrow 512$ ), and the resulting 512-dimensional vector is reshaped into a coefficient matrix  $\Omega_\zeta(\mathbf{f}) \in \mathbb{R}^{128 \times 4}$  used in (8). ReLU activation is used after each convolutional and each linear layer. During training, we used Adam optimizer with a learning rate set to 0.001, reduced at each epoch with an exponential decay of 0.999.

### B. Ablation Studies

We conduct an ablation study in which we first train only the feature extractor  $f_\theta$  with InfoNCE loss (and obtain network weights  $\theta_1$ ). Subsequently, we include the subspace estimator  $g_\phi$  and continue training with the entire loss, resulting in weights  $\theta_2$ . The two sets of weights are compared using the classification error of clustering in the feature space. Table 3 shows that the performance on validation and test data improves with the full architecture and the complete loss, proving the advantage of training the feature extractor  $f_\theta$  together with the subspace estimator  $g_\phi$ .

| Weights    | Arch. + loss                       | Validation subset |        | Test subset |        |
|------------|------------------------------------|-------------------|--------|-------------|--------|
|            |                                    | Mean              | Median | Mean        | Median |
| $\theta_1$ | $f_\theta$ + InfoNCE loss          | 1.80              | 0.00   | 2.97        | 0.00   |
| $\theta_2$ | $f_\theta$ + $g_\phi$ + total loss | 1.51              | 0.00   | 0.85        | 0.21   |

Table 3. Classification error (%) of clustering with  $f_{\theta_1}$  trained using  $f_\theta$  + InfoNCE, and  $f_{\theta_2}$  trained using  $f_\theta$  &  $g_\phi$  + total loss.

### C. Time Complexity

As discussed in the main paper, our method is very fast. Its time complexity is analysed below. A single trajectory inference requires  $\mathcal{O}(F)$  computations due to the convolutional structure. Passing  $N$  full trajectories is therefore

$\mathcal{O}(NF)$ , and the subsequent clustering requires  $\mathcal{O}(N^2)$ . The trajectory completion comprises matrix operations of size up to  $2F \times 2F$  hence costs  $\mathcal{O}(F^3)$ . It can also be sped up by employing randomized singular value decomposition.
